# Supplementary material for: Early-Life Exposure to Environmental Contaminants Perturbs the Sperm Epigenome and Induces Negative Pregnancy Outcomes for Three Generations via the Paternal Lineage
Source: MDPI journal article supplement (doi:10.3390/epigenomes5020010), 2021-05-01
Supplement: s1 [file s1]

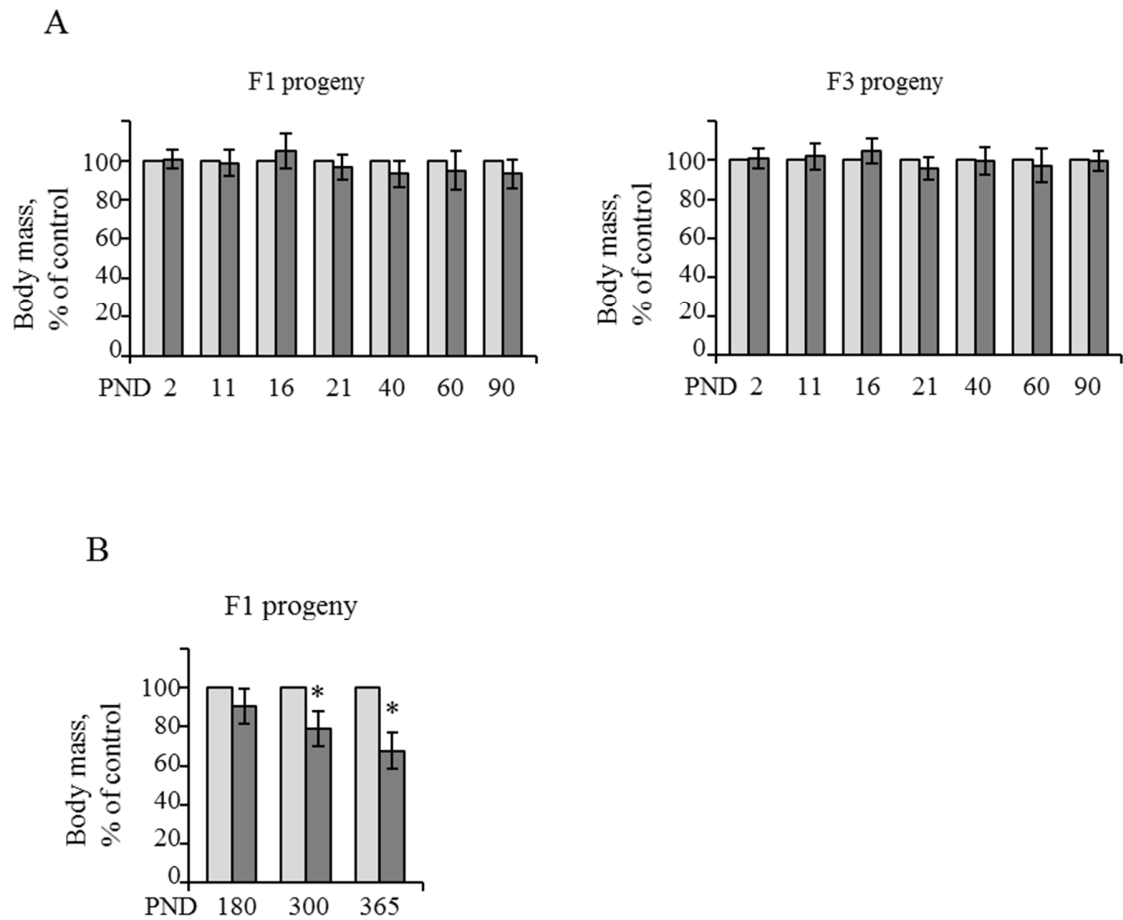

**Figure S1. Body mass of male descendants of females exposed to POPs, relative to the control group.**

(A) F1 and F3 progeny; (B) F3 progeny for up to 1 year; light grey = control group; dark grey = exposed group.

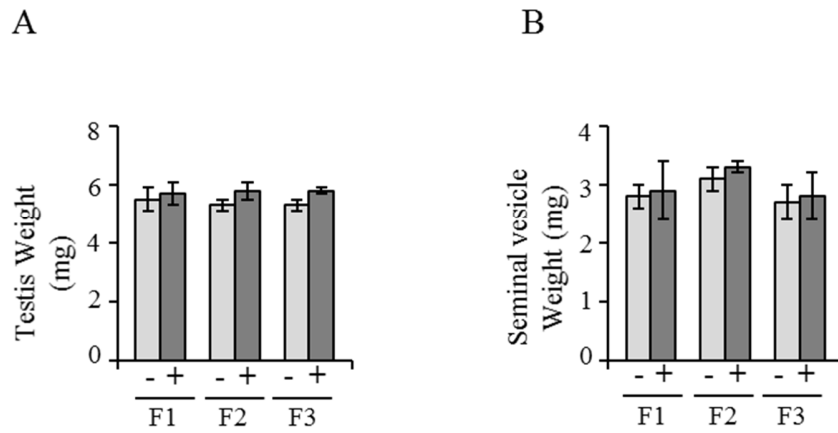

**Figure S2. Exposure of females to POPs, effects on fertility parameters in the male descendants**

A) Body-mass corrected testis wet mass; B) Body-mass adjusted seminal vesicle mass; Values are means with s.e.m. from a parametric paired t-test; “-” is unexposed, “+” is exposed; n = 15 animals per treatment per generation (\*P < 0.05)

Maurice *et al.* Supplementary data, Figure S3

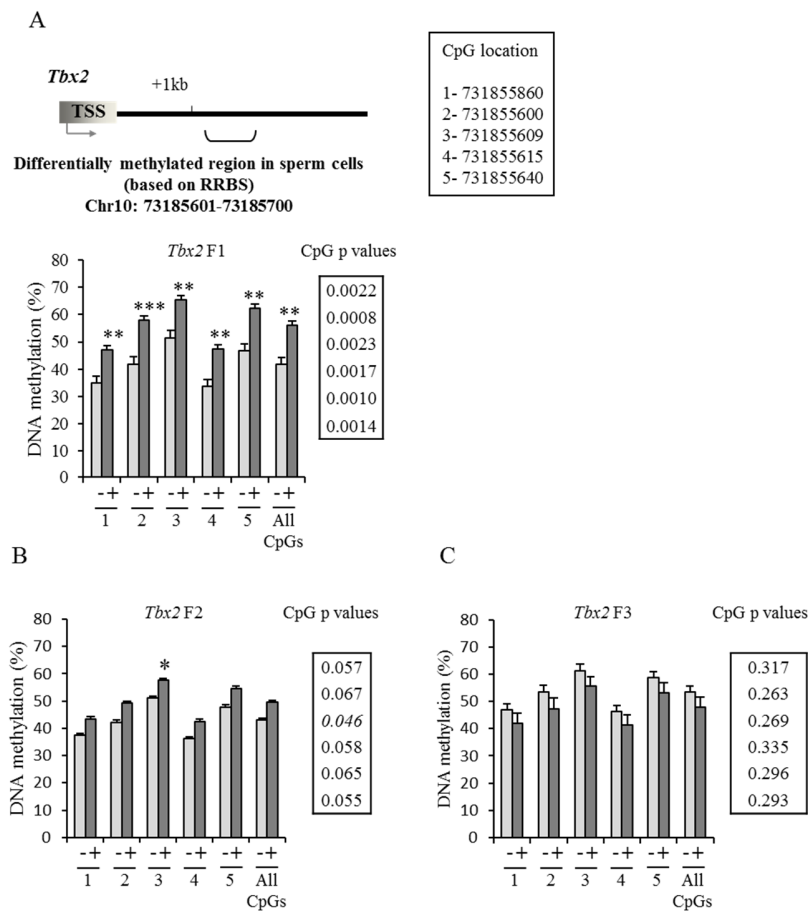

**Figure S3. Pyro-sequencing validation of RRBS data in the *Tbx2* gene**

Pyrosequencing after bisulphite conversion shows the methylation levels of 5 CpG regions located in the *Tbx2* gene in F1 (A), F2 (B) and F3 (C) descendants of Sprague Dawley F0 female rats exposed (+) or not (-) to POPs. Standard error of the mean was calculated within generations (unexposed vs. exposed group) using a parametric paired t-test. \*P < 0.05, \*\*p < 0.01, \*\*\*P < 0.001.

Maurice *et al.* Supplementary data, Figure S4

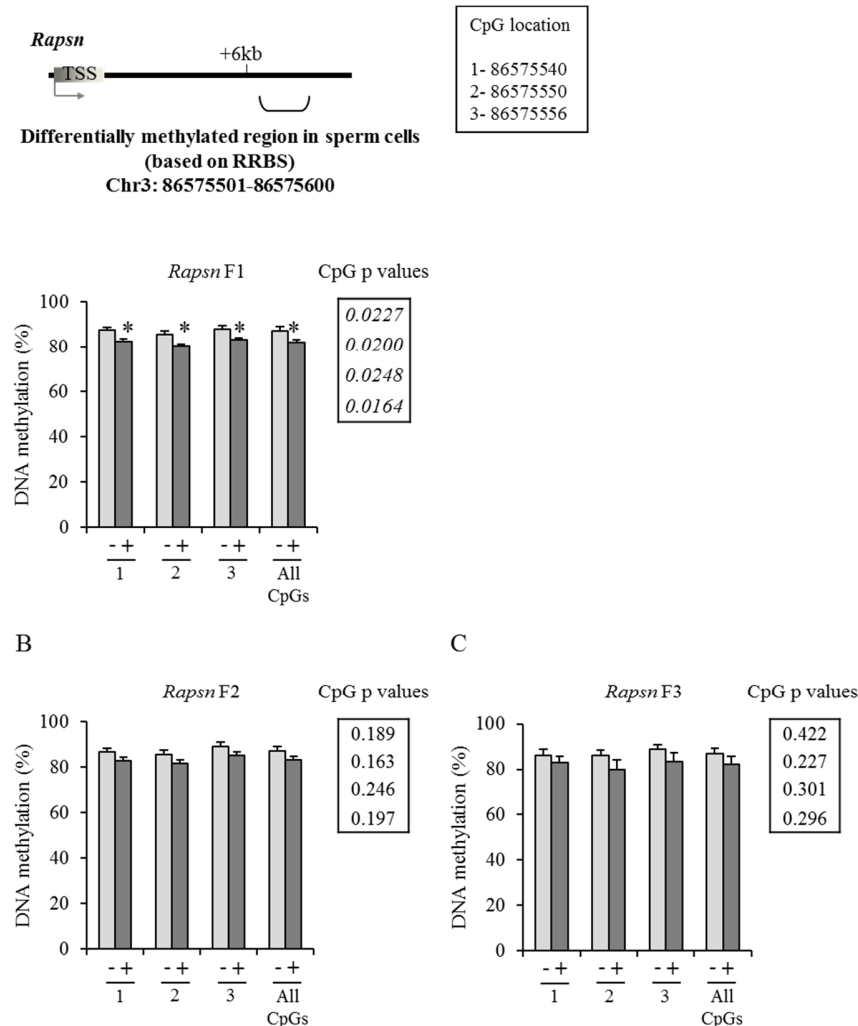

**Figure S4. Pyro-sequencing validation of RRBS data in the *Rapsn* gene**

Pyrosequencing after bisulphite conversion shows the methylation levels of 5 CpG regions located in the *Tbx2* gene in F1 (A), F2 (B) and F3 (C) descendants of Sprague Dawley F0 female rats exposed (+) or not (-) to POPs. Standard error of the mean was calculated within generations (unexposed vs. exposed group) using a parametric paired t-test. \*P < 0.05, \*\*P < 0.01, \*\*\*P < 0.001.



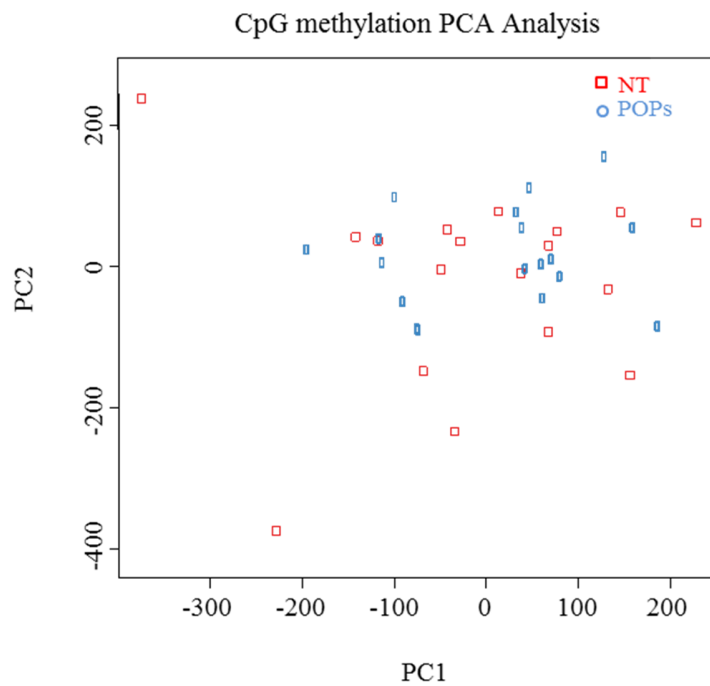

**Figure S5. Principal component analysis of methylation values**

Principal component analysis of CpG site methylation values for unexposed (square,  $n = 18$ ) and exposed (circle,  $n = 18$ ) Sprague Dawley rat male to POPs via F0 females. All data were normalized and PCA was performed using methylKit version 0.9.4. Shown are the first and second principal components accounting for the most variance in the normalized dataset.

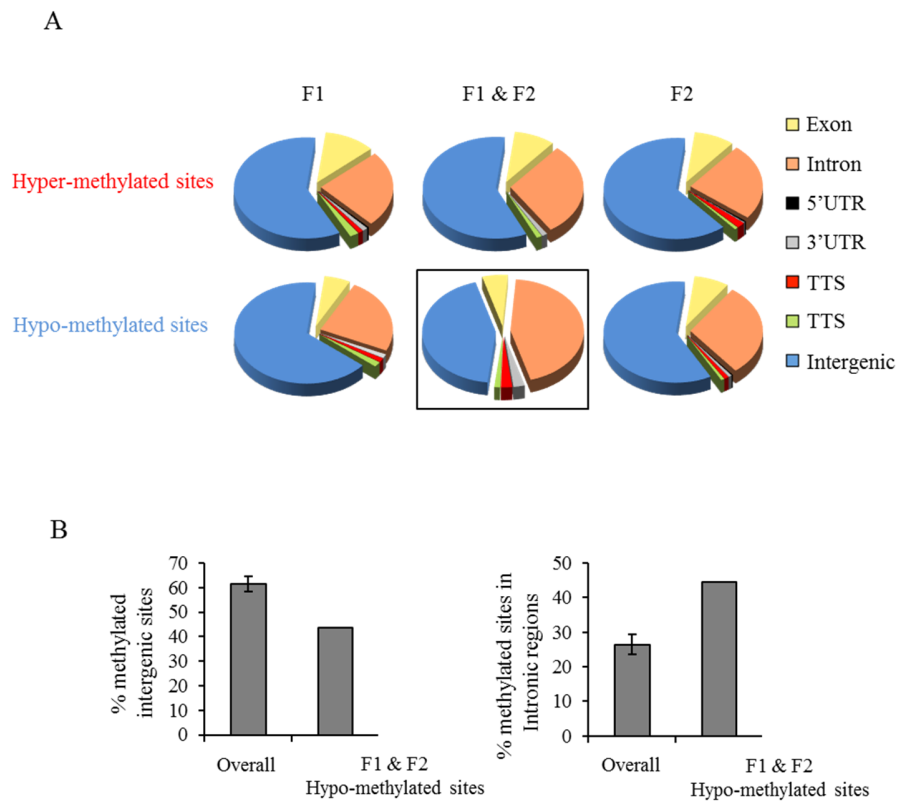

**Figure S6. The percentage of hypo-methylated sites in intronic regions is greater in intergenerational transmission.**

A) Venn diagrams of hyper-methylated site (top) and hypo-methylated site (bottom) distribution throughout the genome in F1, F2 or both generations. B) Methylated sites in intergenic regions (left) or intronic regions (right). “Overall” represents the average from all Venn diagrams without F1 and F2 hypo-methylated sites.

Maurice *et al.* Supplementary data, Figure S7

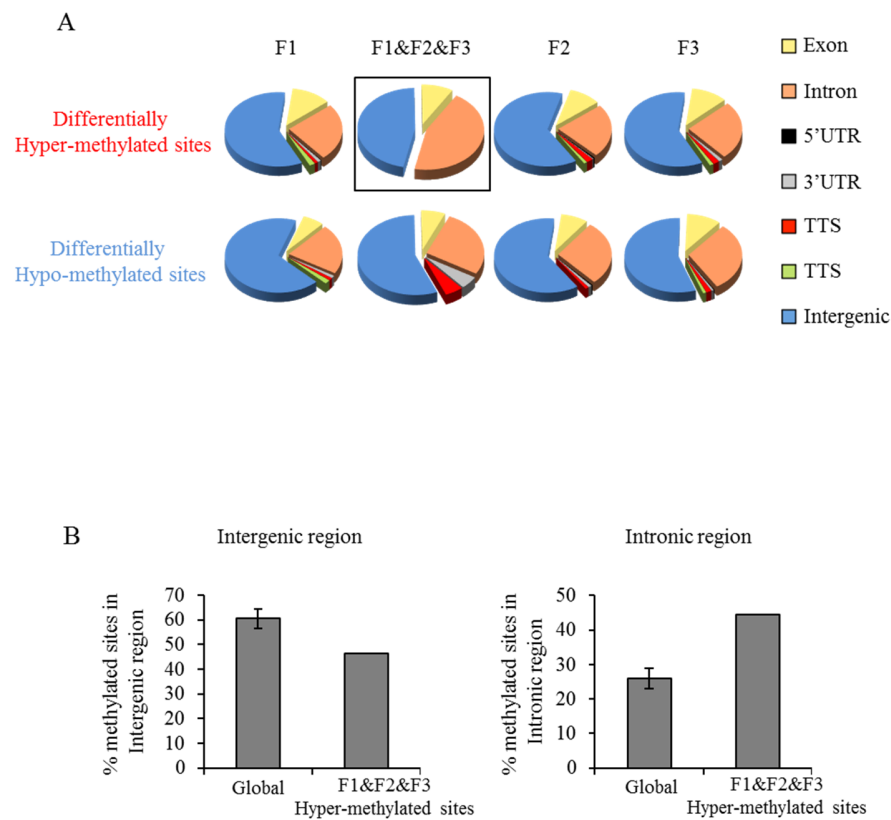

**Figure S7. The percentage of hyper-methylated sites in intronic regions is greater in trans-generational transmission.**

A) Venn diagrams of hyper-methylated site (top) and hypo-methylated site (bottom) distribution throughout the genome in F1, F2, F3 or all three generations. B) Methylated sites in intergenic regions (left) or intronic regions (right). “Overall” represents the average from all Venn diagrams without F1, F2 and F3 hypo-methylated sites.

**Table S1. Composition of the mixture of persistent organic pollutant (POP) compounds used in this study.**

| Compound                                      | Source <sup>b</sup> | % Weight | Dose administered<br>(µg/kg body weight/3 times<br>per week) |               |
|-----------------------------------------------|---------------------|----------|--------------------------------------------------------------|---------------|
|                                               |                     |          | Control<br>group                                             | POPs<br>group |
| Aroclor and congener neat mix <sup>a</sup>    | AccuStandard        | 32.4     | 0                                                            | 500.00        |
| Technical chlordane                           | AccuStandard        | 21.4     | 0                                                            | 330.3         |
| <i>p,p'</i> -Dichlorodiphenyldichloroethylene | Sigma-Aldrich       | 19.3     | 0                                                            | 297.8         |
| <i>p,p'</i> -Dichlorodiphenyltrichloroethane  | SigmaAldrich        | 6.8      | 0                                                            | 104.9         |
| Technical toxaphene                           | AccuStandard        | 6.5      | 0                                                            | 100.0         |
| $\alpha$ -Hexachlorocyclohexane               | Sigma-Aldrich       | 6.2      | 0                                                            | 95.7          |
| Aldrin                                        | Sigma-Aldrich       | 2.5      | 0                                                            | 38.6          |
| Dieldrin                                      | Sigma-Aldrich       | 2.1      | 0                                                            | 32.4          |
| 1, 2, 4, 5-Tetrachlorobenzene                 | Sigma-Aldrich       | 0.9      | 0                                                            | 13.9          |
| <i>p, p'</i> -Dichlorodiphenyldichloroethane  | Sigma-Aldrich       | 0.5      | 0                                                            | 7.7           |
| $\beta$ -Hexachlorocyclohexane                | Sigma-Aldrich       | 0.4      | 0                                                            | 6.2           |
| Hexachlorobenzene                             | AccuStandard        | 0.4      | 0                                                            | 6.2           |
| Mirex                                         | Sigma-Aldrich       | 0.2      | 0                                                            | 3.1           |
| Lindane                                       | Sigma-Aldrich       | 0.2      | 0                                                            | 3.1           |
| Pentachlorobenzene                            | Sigma-Aldrich       | 0.2      | 0                                                            | 3.1           |

<sup>a</sup>Mix containing Aroclor 1260 (58.9%), Aroclor 1254 (39.3%), 2,4,4'-trichlorobiphenyl (PCB 28; 1.0%), 2,2',4,4'-tetrachlorobiphenyl (PCB 47; 0.8%), 3,3',4,4',5-pentachlorobiphenyl (PCB 126; 0.02%), and 3,3',4,4'-tetrachlorobiphenyl (PCB 77; 0.004%). CAS number of each substance are presented in previous study [39].

<sup>b</sup>Sigma-Aldrich (Oakville, ON); AccuStandard (New Haven, CT).

**Table S2. Growth and fertility parameters of the F0 founder females (n=4).**

| Parameter                                  | Control  | POPs     |
|--------------------------------------------|----------|----------|
| F0 body weight after 5 weeks of gavage (g) | 282 ± 11 | 303 ± 15 |
| F0 body weight at parturition (g)          | 464 ± 20 | 482 ± 12 |
| F0 body weight at weaning (g)              | 323 ± 11 | 339 ± 20 |
| Fertility rate (%) <sup>a</sup>            | 100      | 100      |
| Gestation index (%) <sup>b</sup>           | 100      | 100      |
| Gestational length (days)                  | 22 ± 0   | 22 ± 0   |
| Males (%)                                  | 47 ± 8   | 55 ± 7   |

<sup>a</sup>Fertility rate was the number of gravid females / the number of mated females x 100.

<sup>b</sup>Gestation index was the number of females with live births / the number of gravid females x 100.

**Table S3. Development of ovarian follicles in F0 founder females and their F1 offspring.**

| Follicle count | F0 founders (n=4) |        | F1 offspring (n=4) |        |
|----------------|-------------------|--------|--------------------|--------|
|                | Control           | POPs   | Control            | POPs   |
| Primordial     | 72 ± 5            | 77 ± 3 | 71 ± 2             | 71 ± 2 |
| Primary        | 17 ± 4            | 15 ± 3 | 18 ± 2             | 16 ± 1 |
| Preantral      | 5 ± 1             | 5 ± 1  | 6 ± 1              | 7 ± 1  |
| Antral         | 6 ± 2             | 4 ± 0  | 5 ± 1              | 5 ± 1  |

**Table S4. Sub-fertility of sperm of descendants of F0 founders exposed to POPs (n=15).**

| Generation                               | F1          |                    | F2          |                    | F3          |             |
|------------------------------------------|-------------|--------------------|-------------|--------------------|-------------|-------------|
| Treatment                                | Control     | POPs               | Control     | POPs               | Control     | POPs        |
| <b>Flow cytometer</b>                    |             |                    |             |                    |             |             |
| % live sperm cells                       | 56 ± 1      | 57 ± 1             | 63 ± 1      | 57 ± 1             | 71 ± 1      | 73 ± 3      |
| % sperm cells with intact acrosomes      | 94 ± 1      | 93 ± 1             | 94 ± 1      | 93 ± 1             | 91 ± 2      | 94 ± 2      |
| % live sperm cells with intact acrosomes | 57 ± 1      | 57 ± 1             | 57 ± 1      | 57 ± 1             | 70 ± 2      | 71 ± 3      |
| <b>CTC pattern</b>                       |             |                    |             |                    |             |             |
| % F pattern                              | 74 ± 1      | 75 ± 1             | 81 ± 1      | 83 ± 1             | 88 ± 2      | 85 ± 3      |
| % B pattern                              | 21 ± 1      | 21 ± 1             | 19 ± 1      | 17 ± 1             | 12 ± 1      | 15 ± 1      |
| % AR pattern                             | 3 ± 1       | 0                  | 0           | 0                  | 0           | 0           |
| <b>Motility parameters</b>               |             |                    |             |                    |             |             |
| % motile                                 | 60 ± 4      | <b>33 ± 4*</b>     | 62 ± 3      | 63 ± 4             | 72 ± 4      | 77 ± 5      |
| % displaying progressive motility        | 53 ± 3      | <b>29 ± 5*</b>     | 58 ± 3      | 60 ± 4             | 68 ± 3      | 74 ± 3      |
| VAP (µm/sec)                             | 185.8 ± 4.5 | 179.1 ± 4.7        | 184.8 ± 4.5 | 183.1 ± 4.7        | 183.3 ± 4.4 | 186.6 ± 2.1 |
| VSL (µm/sec)                             | 116.4 ± 3.1 | 112.1 ± 3.3        | 115.4 ± 3.1 | 114.1 ± 3.3        | 113.3 ± 3.2 | 116.3 ± 2.5 |
| VCL (µm/sec)                             | 322.5 ± 6.9 | 314.7 ± 7.1        | 321.5 ± 6.9 | 318.7 ± 7.1        | 318.3 ± 4.3 | 316 ± 2.8   |
| ALH (µm)                                 | 17.7 ± 0.2  | <b>16.5 ± 0.3*</b> | 17.4 ± 0.2  | <b>16.1 ± 0.3*</b> | 16.4 ± 0.4  | 16.9 ± 0.5  |
| BCF (Hz)                                 | 20.1 ± 0.3  | <b>18.3 ± 0.3*</b> | 21.1 ± 0.3  | <b>19.3 ± 0.3*</b> | 20.4 ± 0.5  | 20.1 ± 0.1  |
| % STR                                    | 61.3 ± 0.5  | 60.3 ± 0.8         | 63.1 ± 0.5  | 62.1 ± 0.8         | 62.4 ± 0.6  | 63.1 ± 0.4  |
| % LIN                                    | 36.4 ± 1.0  | 36.9 ± 1.0         | 35.9 ± 1.0  | 36.1 ± 1.0         | 35.9 ± 0.7  | 36.3 ± 0.4  |

\*statistically significant from control group P&lt;0.05

**Table S5. Sperm chromatin stability assay and DNA/protein composition**

| Generation | % DFI   |         | % CMA3 positive |         | % CMA3 negative |         |
|------------|---------|---------|-----------------|---------|-----------------|---------|
|            | Control | Exposed | Control         | Exposed | Control         | Exposed |
| <b>F1</b>  | 1 ± 0   | 1 ± 0   | 0               | 0       | 100             | 100     |
| <b>F2</b>  | 1 ± 0   | 1 ± 0   | 0               | 0       | 100             | 100     |
| <b>F3</b>  | 1 ± 0   | 1 ± 0   | 0               | 0       | 100             | 100     |

The Sperm Chromatin Structure Assay (SCSA®) was used to measure sperm chromatin fragmentation. The chromomycin A3 (CMA3) assay was used to quantify protamine (positive = low, negative = abundant). n = 4 in F1, F2 and F3 control and exposed groups. DFI = DNA fragmentation index



Maurice *et al.* Supplementary data, Table S6

**Table S6. Differentially methylated *Dnmt* genes in F1, F2 and F3 generations of male Sprague Dawley rats after F0 maternal exposure to persistent organic pollutants**

COV10\_Met20

| Symbol | Name | Generation | Methylation status | Location |
|--------|------|------------|--------------------|----------|
|--------|------|------------|--------------------|----------|

|               |                              |    |       |         |
|---------------|------------------------------|----|-------|---------|
| <i>Dnmt3l</i> | DNA-methyltransferase 3-like | F1 | Hyper | Exon 10 |
|---------------|------------------------------|----|-------|---------|

COV10\_Met10

| Symbol | Name | Generation | Methylation status | Location |
|--------|------|------------|--------------------|----------|
|--------|------|------------|--------------------|----------|

|               |                              |    |       |          |
|---------------|------------------------------|----|-------|----------|
| <i>Dnmt3l</i> | DNA-methyltransferase 3-like | F1 | Hyper | Exon 10  |
|               |                              | F2 | Hypo  | Intron 6 |
|               |                              | F3 | Hypo  | Exon 7   |

Upper panel: methylKit version 0.9.4 parameters = 10 reads per sample, q value  $\leq 0.01$  and  $\pm \geq 20\%$  average differences between groups of replicates; lower panel: methylKit version 0.9.4 parameters = 10 reads per sample, q value  $\leq 0.01$  and  $\pm \geq 10\%$  average differences between groups of replicates.

**Table S7. Biological processes associated with genes found differentially methylated in sperm cells of F1 progeny of female rats exposed to persistent organic pollutants.**

| Process or function                            | Count<br>(total = 397) | %     | P value  |
|------------------------------------------------|------------------------|-------|----------|
| <b>Developmental</b>                           | 242                    | 60.95 |          |
| <b>cellular processes</b>                      |                        |       |          |
| cell development                               | 86                     | 18.7  | 5.77E-05 |
| cell morphogenesis                             | 70                     | 15.2  | 2.89E-07 |
| cell motility                                  | 46                     | 10.0  | 1.50E-02 |
| <b>organ development</b>                       | 97                     | 21.0  | 1.28E-02 |
| brain                                          | 26                     | 5.6   | 4.41E-02 |
| tube                                           | 25                     | 5.4   | 2.04E-02 |
| kidney                                         | 16                     | 3.5   | 3.59E-03 |
| renal system                                   | 16                     | 3.5   | 5.85E-03 |
| respiratory system                             | 12                     | 2.6   | 2.34E-02 |
| lung                                           | 11                     | 2.4   | 2.17E-02 |
| <b>system development</b>                      | 138                    | 29.9  | 1.14E-03 |
| <b>embryo development</b>                      | 37                     | 8.0   | 1.55E-02 |
| <b>Metabolic</b>                               | 170                    | 42.82 |          |
| positive regulation of metabolism              | 112                    | 24.3  | 1.52E-02 |
| negative regulation of metabolism              | 82                     | 17.8  | 3.95E-02 |
| organophosphate pathways                       | 44                     | 9.5   | 1.24E-03 |
| ribose phosphate pathways                      | 22                     | 4.8   | 1.46E-02 |
| phospholipid metabolism                        | 17                     | 3.7   | 2.38E-02 |
| inositol phosphate metabolism                  | 7                      | 1.5   | 6.72E-03 |
| <b>Signal transduction</b>                     | 145                    | 36.52 |          |
| regulation of cell communication               | 94                     | 20.4  | 2.60E-02 |
| intracellular signal transduction              | 90                     | 19.5  | 2.76E-03 |
| cell-cell signaling                            | 54                     | 11.7  | 4.78E-05 |
| response to growth factor                      | 43                     | 9.3   | 1.82E-04 |
| response to hormone                            | 41                     | 8.9   | 4.81E-03 |
| signal transduction by protein phosphorylation | 36                     | 7.8   | 2.74E-03 |
| MAPK cascade                                   | 35                     | 7.6   | 2.48E-03 |
| <b>NSC and brain development</b>               | 96                     | 24.18 |          |
| nervous system development                     | 88                     | 19.1  | 1.11E-04 |
| neuron development                             | 62                     | 13.4  | 2.06E-07 |
| central nervous system development             | 33                     | 7.2   | 3.76E-02 |
| learning                                       | 14                     | 3.0   | 5.32E-05 |
| synapse assembly                               | 9                      | 2.0   | 1.86E-02 |
| memory                                         | 8                      | 1.7   | 1.35E-02 |
| <b>Regulation of transcription</b>             | 56                     | 14.10 |          |
| positive regulation of gene expression         | 56                     | 12.1  | 4.35E-02 |
| positive regulation of RNA metabolic process   | 51                     | 11.1  | 1.92E-02 |
| <b>Blood system and vascular development</b>   | 74                     | 18.63 |          |
| circulatory system development                 | 37                     | 8.0   | 9.60E-03 |
| cardiovascular system development              | 37                     | 8.0   | 9.60E-03 |
| blood coagulation                              | 30                     | 6.5   | 1.35E-04 |
| blood vessel morphogenesis                     | 20                     | 4.3   | 3.78E-02 |
| regulation of blood circulation                | 18                     | 3.9   | 1.43E-03 |
| regulation of angiogenesis                     | 12                     | 2.6   | 1.75E-02 |

Based on Gene Ontology (DAVID v6.8, Gene\_Ontology: GOTERM\_BP\_4, functional annotation chart, Count: 2, p &lt; 0.05)

**Table S8. Human diseases corresponding to genes found differentially methylated in sperm cells of F1 offspring of females rats exposed to persistent organic pollutants.**

| Disease category                                | Count<br>(Total = 461) | %           | P value         |
|-------------------------------------------------|------------------------|-------------|-----------------|
| <b>METABOLIC</b>                                | <b>176</b>             | <b>38.2</b> | <b>1.05E-04</b> |
| Cholesterol, HDL                                | 22                     | 4.8         | 6.57E-03        |
| Triglycerides                                   | 20                     | 4.3         | 2.60E-02        |
| Plasma HDL cholesterol (HDL-C) levels           | 13                     | 2.8         | 3.58E-02        |
| Diabetes mellitus type 2                        | 11                     | 2.4         | 2.15E-02        |
| Type 1 diabetes                                 | 5                      | 1.1         | 4.15E-02        |
| Blood pressure                                  | 20                     | 4.3         | 4.21E-02        |
| Body weight                                     | 18                     | 3.9         | 4.95E-02        |
| Weight gain                                     | 9                      | 2.0         | 2.64E-02        |
| Dyslipidemias                                   | 3                      | 0.7         | 4.58E-02        |
| <b>CARDIOVASCULAR</b>                           | <b>150</b>             | <b>32.5</b> | <b>4.65E-05</b> |
| QT interval                                     | 4                      | 0.9         | 4.91E-02        |
| EK, abnormal                                    | 3                      | 0.7         | 3.35E-02        |
| Coronary disease, myocardial infarction, stroke | 3                      | 0.7         | 2.27E-02        |
| Tunica media                                    | 11                     | 2.4         | 1.55E-02        |
| <b>CHEMICAL DEPENDENCY</b>                      | <b>143</b>             | <b>31.0</b> | <b>1.18E-07</b> |
| Tobacco use disorder                            | 127                    | 27.5        | 2.72E-08        |
| <b>NEUROLOGICAL</b>                             | <b>100</b>             | <b>21.7</b> | <b>3.45E-03</b> |
| Alzheimer's disease                             | 45                     | 9.8         | 2.41E-04        |
| Hirschsprung's disease                          | 4                      | 0.9         | 9.76E-03        |
| <b>IMMUNE</b>                                   | <b>95</b>              | <b>20.6</b> | <b>4.08E-02</b> |
| natural antibodies                              | 3                      | 0.7         | 2.79E-02        |
| <b>PSYCHIATRIC</b>                              | <b>66</b>              | <b>14.3</b> | <b>4.09E-02</b> |
| Sleep disturbances                              | 6                      | 1.3         | 2.19E-02        |
| Perphenazine                                    | 3                      | 0.7         | 2.27E-02        |
| major depressive disorder                       | 3                      | 0.7         | 3.35E-02        |
| <b>RENAL</b>                                    | <b>59</b>              | <b>12.8</b> | <b>6.13E-04</b> |
| <b>HEMATOLOGICAL</b>                            | <b>59</b>              | <b>12.8</b> | <b>3.62E-03</b> |
| Erythrocyte count                               | 15                     | 3.3         | 6.58E-04        |
| Hematocrit                                      | 8                      | 1.7         | 3.19E-02        |
| Hemoglobin A, glycosylated                      | 10                     | 2.2         | 4.71E-02        |
| <b>DEVELOPMENTAL</b>                            | <b>58</b>              | <b>12.6</b> | <b>3.87E-03</b> |
| Cleft lip, cleft palate, tooth abnormalities    | 7                      | 1.5         | 2.12E-02        |
| oral clefts                                     | 3                      | 0.7         | 4.58E-02        |

Based on Gene Ontology using EntrezGene identifiers (DAVID v6.8. Disease: GAD\_disease + GAD\_disease\_class,  $p < 0.05$ )

Maurice *et al.* Supplementary data, Table S9

**Table S9. Biological processes associated with genes found differentially methylated in sperm cells of F2 progeny of female rats exposed to persistent organic pollutants**

| Process or function                                     | Count<br>(total = 246) | %     | P value  |
|---------------------------------------------------------|------------------------|-------|----------|
| <b>Developmental</b>                                    | 129                    | 52.43 |          |
| <b>cellular process</b>                                 |                        |       |          |
| cell differentiation                                    | 78                     | 26.6  | 5.39E-03 |
| cell development                                        | 46                     | 15.7  | 4.33E-02 |
| <b>Skeletal development</b>                             |                        |       |          |
| skeletal system development                             | 16                     | 5.5   | 1.03E-02 |
| cartilage development                                   | 9                      | 3.1   | 7.85E-03 |
| <b>Muscle development</b>                               |                        |       |          |
| muscle organ development                                | 12                     | 4.1   | 2.47E-02 |
| muscle tissue morphogenesis                             | 7                      | 2.4   | 4.76E-04 |
| myofibril assembly                                      | 4                      | 1.4   | 4.77E-02 |
| <b>Connective tissue development</b>                    | 10                     | 3.4   | 1.17E-02 |
| <b>Metabolic</b>                                        | 133                    | 54.06 |          |
| positive regulation of metabolism                       | 73                     | 24.9  | 1.56E-02 |
| regulation of protein metabolism                        | 52                     | 17.7  | 3.35E-02 |
| regulation of phosphorus metabolism                     | 37                     | 12.6  | 3.75E-02 |
| organophosphate metabolism                              | 27                     | 9.2   | 1.38E-02 |
| nucleoside metabolism                                   | 12                     | 4.1   | 2.91E-02 |
| <b>Enzymatic activity</b>                               |                        |       |          |
| regulation of catalytic activity                        | 47                     | 16.0  | 4.42E-02 |
| regulation of hydrolase activity                        | 29                     | 9.9   | 3.17E-02 |
| <b>Lipid process</b>                                    |                        |       |          |
| cellular lipid metabolism                               | 24                     | 8.2   | 3.29E-02 |
| phospholipid metabolism                                 | 12                     | 4.1   | 2.91E-02 |
| lipid catabolism                                        | 10                     | 3.4   | 3.21E-02 |
| <b>Carbohydrate metabolism</b>                          |                        |       |          |
| glycosyl compound pathways                              | 13                     | 4.4   | 1.76E-02 |
| single-organism carbohydrate catabolism                 | 6                      | 2.0   | 4.74E-02 |
| glucose 6-phosphate pathways                            | 3                      | 1.0   | 4.43E-02 |
| <b>Signal transduction</b>                              | 115                    | 46.74 |          |
| intracellular signal transduction                       | 59                     | 20.1  | 4.47E-03 |
| cell surface receptor signaling pathway                 | 54                     | 18.4  | 4.11E-02 |
| programmed cell death                                   | 39                     | 13.3  | 4.74E-02 |
| regulation of response to stress                        | 34                     | 11.6  | 2.47E-02 |
| regulation of cell death                                | 34                     | 11.6  | 3.52E-02 |
| positive regulation of multicellular organismal process | 31                     | 10.6  | 4.95E-02 |
| response to growth factor                               | 23                     | 7.8   | 3.42E-02 |
| stress-activated protein kinase signaling cascade       | 11                     | 3.8   | 1.38E-02 |
| regulation of endocytosis                               | 10                     | 3.4   | 3.94E-03 |
| positive regulation of endocytosis                      | 6                      | 2.0   | 3.32E-02 |
| positive regulation of receptor-mediated endocytosis    | 4                      | 1.4   | 2.98E-02 |
| <b>NSC and brain development</b>                        | 17                     | 6.91  |          |
| positive regulation of nervous system development       | 13                     | 4.4   | 3.72E-02 |
| mesenchyme morphogenesis                                | 4                      | 1.4   | 2.17E-02 |

Based on Gene Ontology using EntrezGene identifiers (DAVID v6.8. Disease: GAD\_disease + GAD\_disease\_class, p < 0.05)

**Table S10. Human diseases corresponding to genes found differentially methylated in sperm cells of F2 offspring of females rats exposed to persistent organic pollutants.**

| Disease category                       | Count<br>(total = 300) | %           | P value         |
|----------------------------------------|------------------------|-------------|-----------------|
| <b>METABOLIC</b>                       | <b>115</b>             | <b>39.2</b> | <b>1.89E-03</b> |
| Triglycerides                          | 18                     | 6.1         | 1.78E-03        |
| Body height                            | 18                     | 6.1         | 2.25E-02        |
| Body mass index                        | 16                     | 5.5         | 2.13E-02        |
| Obesity                                | 14                     | 4.8         | 1.32E-02        |
| Cholesterol, HDL                       | 14                     | 4.8         | 4.13E-02        |
| Diabetes mellitus type 2               | 9                      | 3.1         | 1.31E-02        |
| Diabetes mellitus type 1               | 6                      | 2.0         | 4.11E-02        |
| <b>CARDIOVASCULAR</b>                  | <b>101</b>             | <b>34.5</b> | <b>2.60E-04</b> |
| hypertension                           | 20                     | 6.8         | 4.07E-02        |
| cardiomyopathy                         | 4                      | 1.4         | 3.68E-02        |
| Cardiomyopathy, hypertrophic           | 3                      | 1.0         | 4.29E-02        |
| Cardiomyopathy, dilated                | 3                      | 1.0         | 4.29E-02        |
| <b>CHEMICAL DEPENDENCY</b>             | <b>99</b>              | <b>33.8</b> | <b>6.23E-07</b> |
| Tobacco use disorder                   | 89                     | 30.4        | 1.28E-07        |
| <b>DEVELOPMENTAL</b>                   | <b>38</b>              | <b>13.0</b> | <b>1.97E-02</b> |
| <b>RENAL</b>                           | <b>36</b>              | <b>12.3</b> | <b>2.23E-02</b> |
| <b>AGING</b>                           | <b>26</b>              | <b>8.9</b>  | <b>2.58E-02</b> |
| kidney aging                           | 6                      | 2.0         | 2.98E-02        |
| <b>Neurological</b>                    |                        |             |                 |
| Alzheimer's disease                    | 26                     | 8.9         | 2.64E-02        |
| Apoplexy, cerebral hemorrhages, stroke | 7                      | 2.4         | 3.65E-02        |
| <b>Immune</b>                          |                        |             |                 |
| natural antibodies                     | 3                      | 1.0         | 1.25E-02        |
| Acquired immunodeficiency syndrome     | 3                      | 1.0         | 3.49E-02        |

Based on Gene Ontology using EntrezGene identifiers (DAVID v6.8. Disease: GAD\_disease + GAD\_disease\_class,  $p < 0.05$ )

Maurice *et al.* Supplementary data, Table S11

**Table S11. Biological processes associated with genes found differentially methylated in sperm cells of F3 progeny of female rats exposed to persistent organic pollutants.**

| Process or function                                   | Count<br>(total = 411) | %            | p value         |
|-------------------------------------------------------|------------------------|--------------|-----------------|
| <b>Developmental</b>                                  | <b>117</b>             | <b>43.06</b> |                 |
| <b>cellular process</b>                               |                        |              |                 |
| cell differentiation                                  | 128                    | 26.7         | 8.37E-04        |
| cell development                                      | 77                     | 16.1         | 9.32E-03        |
| cell morphogenesis                                    | 54                     | 11.3         | 9.98E-03        |
| cell motility                                         | 47                     | 9.8          | 1.71E-02        |
| cell morphogenesis involved in differentiation        | 41                     | 8.6          | 1.04E-02        |
| cell projection morphogenesis                         | 40                     | 8.4          | 2.35E-02        |
| <b>system development</b>                             | <b>136</b>             | <b>28.4</b>  | <b>8.89E-03</b> |
| <b>organ morphogenesis</b>                            | <b>35</b>              | <b>7.3</b>   | <b>3.43E-02</b> |
| <b>regulation of cellular component movement</b>      | <b>29</b>              | <b>6.1</b>   | <b>4.42E-02</b> |
| <b>connective tissue development</b>                  | <b>12</b>              | <b>2.5</b>   | <b>4.49E-02</b> |
| <b>Metabolic</b>                                      | <b>163</b>             | <b>39.65</b> |                 |
| phosphate compound metabolism                         | 104                    | 21.7         | 1.35E-03        |
| organonitrogen compound biosynthesis                  | 51                     | 10.6         | 4.65E-03        |
| organophosphate metabolism                            | 42                     | 8.8          | 6.90E-03        |
| negative regulation of phosphorus metabolism          | 23                     | 4.8          | 2.64E-02        |
| glutathione derivative metabolism                     | 5                      | 1.0          | 8.72E-03        |
| xenobiotic catabolism                                 | 3                      | 0.6          | 2.58E-02        |
| <b>Lipid metabolism</b>                               |                        |              |                 |
| phospholipid                                          | 18                     | 3.8          | 1.59E-02        |
| regulation of                                         | 16                     | 3.3          | 7.69E-03        |
| sphingolipid                                          | 9                      | 1.9          | 3.25E-02        |
| <b>Enzymatic activity</b>                             |                        |              |                 |
| regulation of catalytic activity                      | 74                     | 15.4         | 4.29E-02        |
| positive regulation of hydrolase activity             | 35                     | 7.3          | 6.04E-03        |
| <b>Carbohydrate metabolism</b>                        |                        |              |                 |
| carbohydrate derivative biosynthesis                  | 35                     | 7.3          | 1.17E-02        |
| <b>Signal transduction</b>                            | <b>188</b>             | <b>45.74</b> |                 |
| <b>regulation of cell communication</b>               | <b>100</b>             | <b>20.9</b>  | <b>1.05E-02</b> |
| cell surface receptor signaling pathway               | 93                     | 19.4         | 3.49E-03        |
| intracellular signal transduction                     | 85                     | 17.7         | 3.45E-02        |
| cell-cell signaling                                   | 58                     | 12.1         | 8.11E-06        |
| regulation of cell death                              | 52                     | 10.9         | 4.07E-02        |
| <b>Hormonal regulation</b>                            |                        |              |                 |
| regulation of hormone secretion                       | 15                     | 3.1          | 1.21E-02        |
| regulation of peptide hormone secretion               | 14                     | 2.9          | 5.54E-03        |
| negative regulation of peptide hormone secretion      | 5                      | 1.0          | 3.21E-02        |
| response to growth factor                             | 36                     | 7.5          | 1.92E-02        |
| signal release                                        | 21                     | 4.4          | 7.13E-03        |
| positive regulation of growth                         | 12                     | 2.5          | 4.60E-02        |
| regulation of fibroblast proliferation                | 7                      | 1.5          | 2.32E-02        |
| negative regulation of peptide secretion              | 5                      | 1.0          | 3.67E-02        |
| <b>CNS and brain development</b>                      | <b>116</b>             | <b>28.22</b> |                 |
| nervous system development                            | 80                     | 16.7         | 9.79E-03        |
| neuron development                                    | 44                     | 9.2          | 2.85E-02        |
| neuron projection development                         | 42                     | 8.8          | 1.17E-02        |
| synaptic transmission                                 | 33                     | 6.9          | 1.25E-03        |
| neuron projection guidance                            | 30                     | 6.3          | 4.89E-04        |
| tube morphogenesis                                    | 17                     | 3.5          | 3.03E-02        |
| neuron death                                          | 15                     | 3.1          | 1.37E-02        |
| action potential                                      | 8                      | 1.7          | 2.65E-02        |
| long-term synaptic potentiation                       | 5                      | 1.0          | 4.96E-02        |
| <b>Membrane transport activity</b>                    | <b>138</b>             | <b>33.57</b> |                 |
| ion transport                                         | 68                     | 14.2         | 9.28E-06        |
| regulation of transport                               | 65                     | 13.6         | 3.28E-03        |
| transmembrane transport                               | 60                     | 12.5         | 2.82E-05        |
| vesicle-mediated transport                            | 49                     | 10.2         | 2.14E-02        |
| ion transmembrane transport                           | 42                     | 8.8          | 6.10E-04        |
| regulation of transmembrane transport                 | 17                     | 3.5          | 4.19E-02        |
| hormone transport                                     | 16                     | 3.3          | 2.22E-02        |
| regulation of peptide transport                       | 14                     | 2.9          | 2.71E-02        |
| potassium ion transmembrane transport                 | 11                     | 2.3          | 1.45E-02        |
| negative regulation of transmembrane receptor protein | 8                      | 1.7          | 3.00E-02        |
| serine/threonine kinase signaling pathway             | 6                      | 1.3          | 3.95E-02        |
| positive regulation of transporter activity           | 6                      | 1.3          | 3.95E-02        |
| regulation of membrane repolarization                 | 5                      | 1.0          | 5.38E-03        |
| <b>Homeostasis</b>                                    | <b>63</b>              | <b>15.32</b> |                 |
| chemical homeostasis                                  | 42                     | 8.8          | 1.91E-03        |
| cellular chemical homeostasis                         | 27                     | 5.6          | 1.49E-02        |
| hemostasis                                            | 24                     | 5.0          | 2.22E-02        |
| regulation of ion homeostasis                         | 15                     | 3.1          | 4.98E-04        |

Based on Gene Ontology (DAVID v6.8, Gene\_Ontology: GOTERM\_BP\_4, functional annotation chart, Count: 2, p < 0.05)

**Table S12. Human diseases corresponding to genes found differentially methylated in sperm cells of F2 offspring of females rats exposed to persistent organic pollutants.**

| Disease category                                                                                     | Count<br>(total = 359) | %    | P value  |
|------------------------------------------------------------------------------------------------------|------------------------|------|----------|
| <b>METABOLIC</b>                                                                                     | 196                    | 40.9 | 5.16E-08 |
| Body height                                                                                          | 31                     | 6.5  | 5.51E-04 |
| Triglycerides                                                                                        | 28                     | 5.8  | 7.99E-05 |
| Body mass index                                                                                      | 26                     | 5.4  | 1.72E-03 |
| Body weight                                                                                          | 21                     | 4.4  | 1.00E-02 |
| Cholesterol                                                                                          | 20                     | 4.2  | 2.83E-02 |
| Diabetes mellitus type 2                                                                             | 11                     | 2.3  | 2.59E-02 |
| Diabetes type 1                                                                                      | 11                     | 2.3  | 3.70E-02 |
| Body fat distribution                                                                                | 8                      | 1.7  | 2.38E-02 |
| Diabetes mellitus, type 1                                                                            | 5                      | 1.0  | 1.67E-02 |
| <b>CARDIOVASCULAR</b>                                                                                | 161                    | 33.6 | 1.57E-06 |
| hypertension                                                                                         | 32                     | 6.7  | 6.99E-03 |
| Blood pressure                                                                                       | 22                     | 4.6  | 1.74E-02 |
| Coronary disease                                                                                     | 15                     | 3.1  | 6.61E-03 |
| Atherosclerosis, cardiovascular diseases                                                             | 4                      | 0.8  | 6.72E-04 |
| Cardiomyopathy dilated                                                                               | 4                      | 0.8  | 1.45E-02 |
| <b>CHEMICAL DEPENDENCY</b>                                                                           | 160                    | 33.4 | 1.53E-11 |
| Tobacco use disorder                                                                                 | 135                    | 28.2 | 1.06E-09 |
| Alcoholism                                                                                           | 26                     | 5.4  | 3.88E-03 |
| smoking cessation                                                                                    | 10                     | 2.1  | 2.60E-02 |
| <b>NEUROLOGICAL</b>                                                                                  | 109                    | 22.8 | 2.72E-04 |
| Alzheimer's disease                                                                                  | 43                     | 9.0  | 1.59E-03 |
| Stroke                                                                                               | 27                     | 5.6  | 4.37E-03 |
| hypothyroidism                                                                                       | 4                      | 0.8  | 3.74E-02 |
| Brain ischemia, coronary artery disease, intracranial arteriosclerosis/myocardial infarction, stroke | 3                      | 0.6  | 1.45E-02 |
| Parietal lobe                                                                                        | 3                      | 0.6  | 2.40E-02 |
| Sleep-related                                                                                        | 8                      | 1.7  | 1.26E-03 |
| <b>IMMUNE</b>                                                                                        | 103                    | 21.5 | 8.55E-03 |
| Asthma                                                                                               | 22                     | 4.6  | 1.66E-02 |
| Hodgkin's disease                                                                                    | 5                      | 1.0  | 9.96E-03 |
| myeloid leukemia                                                                                     | 4                      | 0.8  | 3.74E-02 |
| Arthritis, psoriatic                                                                                 | 3                      | 0.6  | 2.95E-02 |
| <b>PSYCHIATRIC</b>                                                                                   | 81                     | 16.9 | 1.86E-04 |
| Bipolar disorder                                                                                     | 22                     | 4.6  | 4.52E-03 |
| several psychiatric disorders                                                                        | 15                     | 3.1  | 3.83E-02 |
| Neuropsychological tests                                                                             | 5                      | 1.0  | 3.02E-02 |
| <b>DEVELOPMENTAL</b>                                                                                 | 62                     | 12.9 | 1.19E-03 |
| Hip                                                                                                  | 20                     | 4.2  | 5.51E-03 |
| Bone density                                                                                         | 13                     | 2.7  | 2.13E-02 |
| Prenatal exposure delayed effects                                                                    | 4                      | 0.8  | 1.06E-02 |
| Sudden infant death                                                                                  | 4                      | 0.8  | 3.39E-02 |
| Eclampsia, pre-eclampsia                                                                             | 3                      | 0.6  | 4.39E-03 |
| <b>RENAL</b>                                                                                         | 61                     | 12.7 | 4.60E-04 |
| Chronic renal failure, kidney failure, chronic                                                       | 37                     | 7.7  | 1.70E-02 |
| <b>AUTO-IMMUNE</b>                                                                                   | 20                     | 5.5  | 1.25E-02 |
| Lupus erythematosus, systemic                                                                        | 16                     | 3.3  | 3.80E-02 |

Based on Gene Ontology (DAVID v6.8, Gene\_Ontology: GOTERM\_BP\_4, functional annotation chart, Count: 2, p &lt; 0.05)



**Table S13. Differentially methylated genes conserved in sperm cells of both F1 and F2 progeny of female rats exposed to persistent organic pollutants.**

| Function                                            | Count<br>(total = 81) | %     | P value  |
|-----------------------------------------------------|-----------------------|-------|----------|
| <b>Metabolic pathways</b>                           | 46                    | 56.79 |          |
| phosphate compound metabolism                       | 30                    | 30.9  | 2.29E-04 |
| positive regulation                                 | 29                    | 29.9  | 1.17E-02 |
| positive regulation of cellular metabolic processes | 25                    | 25.8  | 1.15E-02 |
| positive regulation of macromolecule processes      | 22                    | 22.7  | 4.65E-02 |
| positive regulation of protein metabolism           | 14                    | 14.4  | 4.79E-02 |
| organophosphate metabolism                          | 13                    | 13.4  | 6.86E-03 |
| <b>Lipid-related</b>                                |                       |       |          |
| cellular lipid metabolism                           | 12                    | 12.4  | 1.06E-02 |
| phospholipid metabolism                             | 7                     | 7.2   | 1.09E-02 |
| glycerolipid metabolism                             | 6                     | 6.2   | 4.11E-02 |
| <b>Signal transduction</b>                          | 18                    | 22.2  |          |
| positive regulation of response to stimulus         | 18                    | 18.6  | 3.66E-02 |
| regulation of cell death                            | 16                    | 16.5  | 9.75E-03 |
| regulation of response to stress                    | 14                    | 14.4  | 3.71E-02 |
| response to growth factor                           | 10                    | 10.3  | 4.65E-02 |
| <b>Immune system and inflammatory response</b>      | 31                    | 38.27 |          |
| regulation of immune response                       | 12                    | 12.4  | 1.34E-02 |
| regulation of host defenses                         | 10                    | 10.3  | 1.79E-02 |
| inflammatory response                               | 10                    | 10.3  | 3.72E-03 |
| activation of immune response                       | 9                     | 9.3   | 5.69E-03 |
| platelet activation                                 | 5                     | 5.2   | 3.91E-02 |
| complement activation/humoral immune response       | 3                     | 3.1   | 9.85E-03 |

Based on Gene Ontology (DAVID v6.8, Gene\_Ontology: GOTERM\_BP\_4, functional annotation chart, Count: 2, p < 0.05)

**Table S14. Human diseases corresponding to genes found methylated differentially in sperm cells of both F1 and F2 progeny of female rats exposed to persistent organic pollutants**

| Disease category                      | Count<br>(total = 77) | %    | P value  |
|---------------------------------------|-----------------------|------|----------|
| <b>METABOLIC</b>                      | 43                    | 44.3 | 6.64E-03 |
| Body height                           | 8                     | 8.2  | 4.94E-02 |
| plasma HDL cholesterol (HDL-C) levels | 6                     | 6.2  | 1.53E-02 |
| Diabetes mellitus type 2              | 5                     | 5.2  | 2.05E-02 |
| <b>CHEMICAL DEPENDENCY</b>            | 38                    | 39.2 | 1.04E-04 |
| Tobacco use disorder                  | 34                    | 35.1 | 8.70E-05 |
| Alcoholism                            | 8                     | 8.2  | 2.92E-02 |
| <b>CARDIOVASCULAR</b>                 | 37                    | 38.1 | 5.94E-03 |
| <b>INFECTIOUS</b>                     | 22                    | 22.7 | 1.05E-02 |
| Lupus erythematosus, systemic         | 5                     | 5.2  | 1.35E-02 |
| natural antibodies                    | 3                     | 3.1  | 1.48E-03 |
| <b>RENAL</b>                          | 16                    | 16.5 | 1.63E-02 |
| Chronic renal failure, kidney failure | 12                    | 12.4 | 1.59E-02 |
| kidney aging                          | 4                     | 4.1  | 2.03E-02 |
| <b>DEVELOPMENTAL</b>                  | 16                    | 16.5 | 2.62E-02 |
|                                       |                       |      |          |
| Alzheimer's disease                   | 12                    | 12.4 | 2.20E-02 |
|                                       |                       |      |          |
| Sleep-related                         | 3                     | 3.1  | 4.82E-02 |

Based on Gene Ontology (DAVID v6.8, Gene\_Ontology: GOTERM\_BP\_4, functional annotation chart, Count: 2,  $p < 0.05$ )

Maurice *et al.* Supplementary data, Table S15

**Table S15. Biological processes associated with genes found methylated differentially in sperm cells of F1, F2 and F3 progeny of female rats exposed to persistent organic pollutants**

| Category                         | Count<br>(total = 36) | %    | P value  |
|----------------------------------|-----------------------|------|----------|
| <b>Metabolic pathways</b>        | 5                     | 13.8 |          |
| regulation of lipid metabolism   | 4                     | 9.1  | 2.48E-02 |
| neutral lipid biosynthesis       | 3                     | 6.8  | 1.49E-02 |
| regulation of lipid biosynthesis | 3                     | 6.8  | 3.38E-02 |

Based on Gene Ontology (DAVID v6.8, Gene\_Ontology: GOTERM\_BP\_4, functional annotation chart, Count: 2,  $p < 0.05$ )

Maurice *et al.* Supplementary data, Table S16

**Table S16. Human diseases corresponding to genes found differentially methylated in sperm cells of F1, F2 and F3 progeny of female rats exposed to persistent organic pollutants**

| Disease category                      | Count | List Total | %    | P value  |
|---------------------------------------|-------|------------|------|----------|
| <b>METABOLIC</b>                      | 22    | 44         | 50.0 | 6.22E-03 |
| Triglycerides                         | 5     | 44         | 11.4 | 2.40E-02 |
| plasma HDL cholesterol (HDL-C) levels | 4     | 44         | 9.1  | 2.50E-02 |
| Diabetes mellitus type 1              | 3     | 44         | 6.8  | 3.07E-02 |
| <b>CARDIOVASCULAR</b>                 | 37    | 77         | 38.1 | 5.94E-03 |
| <b>INFECTIOUS</b>                     | 22    | 77         | 22.7 | 1.05E-02 |
| <b>DEVELOPMENTAL</b>                  | 16    | 77         | 16.5 | 2.62E-02 |
| skeletal system development           | 3     | 44         | 6.8  | 3.39E-02 |
| <b>RENAL</b>                          | 16    | 77         | 16.5 | 1.63E-02 |
| Chronic renal failure, kidney failure | 7     | 44         | 15.9 | 2.48E-02 |
| <b>AGING</b>                          | 7     | 44         | 15.9 | 3.03E-02 |
| kidney aging                          | 4     | 44         | 9.1  | 1.99E-03 |

Based on Gene Ontology (DAVID v6.8, Gene\_Ontology: GOTERM\_BP\_4, functional annotation chart, Count: 2,  $p < 0.05$ )

Maurice *et al.* Supplementary data, Table S17

**Table S17. Genes with brain-specific expression found differentially methylated in sperm cells of descendants of female Sprague Dawley rats exposed to POPs**

| Gene Symbol  | Name                                    | Generation | Methylation status | Location      |
|--------------|-----------------------------------------|------------|--------------------|---------------|
| <i>Bai2</i>  | brain-specific angiogenesis inhibitor 2 | F1         | hyper              | intron        |
| <i>Dbx1</i>  | developing brain homeobox 1             | F1         | hyper              | intron        |
| <i>Bai3</i>  | brain-specific angiogenesis inhibitor 3 | F2         | hyper              | intron        |
| <i>Stx1a</i> | syntaxin 1A (brain)                     | F3         | hyper              | intron + Exon |
| <i>Gbx1</i>  | gastrulation brain homeobox 1           | F3         | hypo               | exon          |
| <i>Gbx2</i>  | gastrulation brain homeobox 2           | F3         | hypo               | intron        |

**Table S18:** The quality of sequenced reads for each sample (on library per sample).

| Sample | Generation | Group   | Number of paired reads | Flagged as poor quality reads |    | GC (%) |    |
|--------|------------|---------|------------------------|-------------------------------|----|--------|----|
|        |            |         |                        | R1                            | R2 | R1     | R2 |
| JQ1    | F1         | Control | 13524207               | 0                             | 0  | 36     | 35 |
| JQ2    | F1         | Control | 15611177               | 0                             | 0  | 36     | 35 |
| JQ3    | F1         | Control | 15169004               | 0                             | 0  | 36     | 35 |
| JQ4    | F1         | Control | 13393315               | 0                             | 0  | 35     | 34 |
| JQ5    | F1         | Control | 13916208               | 0                             | 0  | 36     | 34 |
| JQ6    | F1         | Control | 13618851               | 0                             | 0  | 35     | 34 |
| JQ7    | F1         | Case    | 16358142               | 0                             | 0  | 36     | 35 |
| JQ8    | F1         | Case    | 16308465               | 0                             | 0  | 36     | 35 |
| JQ9    | F1         | Case    | 15991423               | 0                             | 0  | 35     | 34 |
| JQ10   | F1         | Case    | 13313672               | 0                             | 0  | 36     | 35 |
| JQ11   | F1         | Case    | 14042897               | 0                             | 0  | 36     | 35 |
| JQ12   | F1         | Case    | 12963975               | 0                             | 0  | 35     | 34 |
| F2A    | F2         | Control | 13219848               | 0                             | 0  | 37     | 37 |
| F2B    | F2         | Control | 16574489               | 0                             | 0  | 37     | 37 |
| F2C    | F2         | Control | 14202003               | 0                             | 0  | 36     | 36 |
| F2D    | F2         | Control | 12790005               | 0                             | 0  | 36     | 36 |
| F2E    | F2         | Control | 14276880               | 0                             | 0  | 36     | 36 |
| F2F    | F2         | Control | 14238800               | 0                             | 0  | 37     | 37 |
| F2G    | F2         | Case    | 11844150               | 0                             | 0  | 38     | 39 |
| F2H    | F2         | Case    | 11966774               | 0                             | 0  | 36     | 36 |
| F2I    | F2         | Case    | 17655677               | 0                             | 0  | 37     | 37 |
| F2J    | F2         | Case    | 12230558               | 0                             | 0  | 36     | 36 |
| F2K    | F2         | Case    | 14706563               | 0                             | 0  | 36     | 36 |
| F2L    | F2         | Case    | 14729885               | 0                             | 0  | 37     | 37 |
| F3A    | F3         | Control | 13999362               | 0                             | 0  | 36     | 35 |
| F3B    | F3         | Control | 13635334               | 0                             | 0  | 35     | 34 |
| F3C    | F3         | Control | 12759812               | 0                             | 0  | 35     | 34 |
| F3D    | F3         | Control | 12759958               | 0                             | 0  | 35     | 34 |
| F3E    | F3         | Control | 12341056               | 0                             | 0  | 35     | 34 |
| F3F    | F3         | Control | 13264039               | 0                             | 0  | 36     | 35 |
| F3G    | F3         | Case    | 13487337               | 0                             | 0  | 36     | 35 |
| F3H    | F3         | Case    | 15194637               | 0                             | 0  | 36     | 36 |
| F3I    | F3         | Case    | 14572998               | 0                             | 0  | 35     | 35 |
| F3J    | F3         | Case    | 13431040               | 0                             | 0  | 36     | 35 |
| F3K    | F3         | Case    | 14236308               | 0                             | 0  | 35     | 35 |
| F3L    | F3         | Case    | 13399654               | 0                             | 0  | 35     | 35 |

**Table S19:** The quality of alignment for each sample (one library per sample).

| Sample | Generation | Group   | Mapped (%) | Mapped and properly paired (%) |
|--------|------------|---------|------------|--------------------------------|
| JQ1    | 1          | Control | 73.40      | 70                             |
| JQ2    | 1          | Control | 73.06      | 69                             |
| JQ3    | 1          | Control | 69.83      | 66                             |
| JQ4    | 1          | Control | 70.45      | 67                             |
| JQ5    | 1          | Control | 67.19      | 63                             |
| JQ6    | 1          | Control | 63.44      | 59                             |
| JQ7    | 1          | Case    | 67.86      | 64                             |
| JQ8    | 1          | Case    | 66.00      | 62                             |
| JQ9    | 1          | Case    | 68.02      | 64                             |
| JQ10   | 1          | Case    | 72.10      | 69                             |
| JQ11   | 1          | Case    | 71.00      | 67                             |
| JQ12   | 1          | Case    | 69.86      | 66                             |
| F2A    | 2          | Control | 70.79      | 67                             |
| F2B    | 2          | Control | 72.00      | 68                             |
| F2C    | 2          | Control | 76.05      | 73                             |
| F2D    | 2          | Control | 75.14      | 72                             |
| F2E    | 2          | Control | 70.54      | 67                             |
| F2F    | 2          | Control | 65.13      | 61                             |
| F2G    | 2          | Case    | 62.27      | 57                             |
| F2H    | 2          | Case    | 72.17      | 68                             |
| F2I    | 2          | Case    | 75.79      | 73                             |
| F2J    | 2          | Case    | 70.91      | 67                             |
| F2K    | 2          | Case    | 68.63      | 65                             |
| F2L    | 2          | Case    | 75.26      | 72                             |
| F3A    | 3          | Control | 74.55      | 71                             |
| F3B    | 3          | Control | 71.66      | 68                             |
| F3C    | 3          | Control | 77.18      | 74                             |
| F3D    | 3          | Control | 72.07      | 69                             |
| F3E    | 3          | Control | 73.18      | 70                             |
| F3F    | 3          | Control | 74.58      | 72                             |
| F3G    | 3          | Case    | 72.80      | 69                             |
| F3H    | 3          | Case    | 72.22      | 69                             |
| F3I    | 3          | Case    | 71.47      | 68                             |
| F3J    | 3          | Case    | 70.94      | 67                             |
| F3K    | 3          | Case    | 69.94      | 66                             |
| F3L    | 3          | Case    | 66.32      | 62                             |

**Table S20:** Statistics related to the coverage of the CpG sites identified in each sample.

| Sample | Generation | Group   | Number of sites | Mean coverage | Standard deviation coverage | Minimum coverage | Maximum coverage |
|--------|------------|---------|-----------------|---------------|-----------------------------|------------------|------------------|
| JQ1    | F1         | Control | 1147142         | 88.03         | 131.56                      | 15               | 16510            |
| JQ2    | F1         | Control | 1252836         | 75.58         | 99.06                       | 15               | 12136            |
| JQ3    | F1         | Control | 1189111         | 77.67         | 136.30                      | 15               | 26319            |
| JQ4    | F1         | Control | 1239409         | 60.67         | 81.60                       | 15               | 10796            |
| JQ5    | F1         | Control | 1240470         | 59.36         | 77.53                       | 15               | 9989             |
| JQ6    | F1         | Control | 1254505         | 53.47         | 81.64                       | 15               | 12870            |
| JQ7    | F1         | Case    | 1315533         | 75.15         | 147.11                      | 15               | 29656            |
| JQ8    | F1         | Case    | 1237065         | 86.30         | 146.71                      | 15               | 28571            |
| JQ9    | F1         | Case    | 1310896         | 69.41         | 115.49                      | 15               | 21973            |
| JQ10   | F1         | Case    | 1188421         | 62.05         | 142.91                      | 15               | 26909            |
| JQ11   | F1         | Case    | 1174421         | 70.65         | 144.18                      | 15               | 28139            |
| JQ12   | F1         | Case    | 1184652         | 61.34         | 106.88                      | 15               | 17218            |
| F2A    | F2         | Control | 1291391         | 63.43         | 89.84                       | 15               | 15528            |
| F2B    | F2         | Control | 1352500         | 74.18         | 113.30                      | 15               | 20625            |
| F2C    | F2         | Control | 1167532         | 78.43         | 124.03                      | 15               | 25099            |
| F2D    | F2         | Control | 1242133         | 59.59         | 95.54                       | 15               | 16439            |
| F2E    | F2         | Control | 1329941         | 61.26         | 101.92                      | 15               | 16658            |
| F2F    | F2         | Control | 1197555         | 62.94         | 101.53                      | 15               | 15890            |
| F2G    | F2         | Case    | 1093121         | 49.86         | 82.32                       | 15               | 15415            |
| F2H    | F2         | Case    | 900941          | 62.57         | 114.80                      | 15               | 18762            |
| F2I    | F2         | Case    | 1272404         | 92.08         | 162.26                      | 15               | 28264            |
| F2J    | F2         | Case    | 1221013         | 59.38         | 105.53                      | 15               | 16936            |
| F2K    | F2         | Case    | 1287416         | 66.30         | 97.79                       | 15               | 16219            |
| F2L    | F2         | Case    | 1228249         | 83.41         | 132.53                      | 15               | 20945            |
| F3A    | F3         | Control | 1417749         | 55.73         | 85.37                       | 15               | 18197            |
| F3B    | F3         | Control | 1337204         | 54.73         | 83.33                       | 15               | 14995            |
| F3C    | F3         | Control | 1390480         | 49.66         | 75.93                       | 15               | 14635            |
| F3D    | F3         | Control | 1471278         | 45.16         | 79.12                       | 15               | 11466            |
| F3E    | F3         | Control | 1291387         | 47.84         | 76.87                       | 15               | 15314            |
| F3F    | F3         | Control | 1322370         | 58.50         | 99.01                       | 15               | 17090            |
| F3G    | F3         | Case    | 1381526         | 52.44         | 91.56                       | 15               | 17732            |
| F3H    | F3         | Case    | 1415542         | 54.02         | 139.17                      | 15               | 27193            |
| F3I    | F3         | Case    | 1459241         | 50.26         | 91.23                       | 15               | 17603            |
| F3J    | F3         | Case    | 1434430         | 46.29         | 73.10                       | 15               | 12673            |
| F3K    | F3         | Case    | 1545507         | 42.39         | 55.81                       | 15               | 10921            |
| F3L    | F3         | Case    | 1340657         | 44.78         | 73.24                       | 15               | 14255            |
